# Supplementary figures and images for: To Tree or Not to Tree? Genome-Wide Quantification of Recombination and Reticulate Evolution during the Diversification of Strict Intracellular Bacteria
Source: PubMed Central journal article supplement — Genome Biol Evol. 2013 Nov 19;5(12):2305–17. doi: 10.1093/gbe/evt178 (PMC3879967; doi:10.1093/gbe/evt178), 2013-11-19

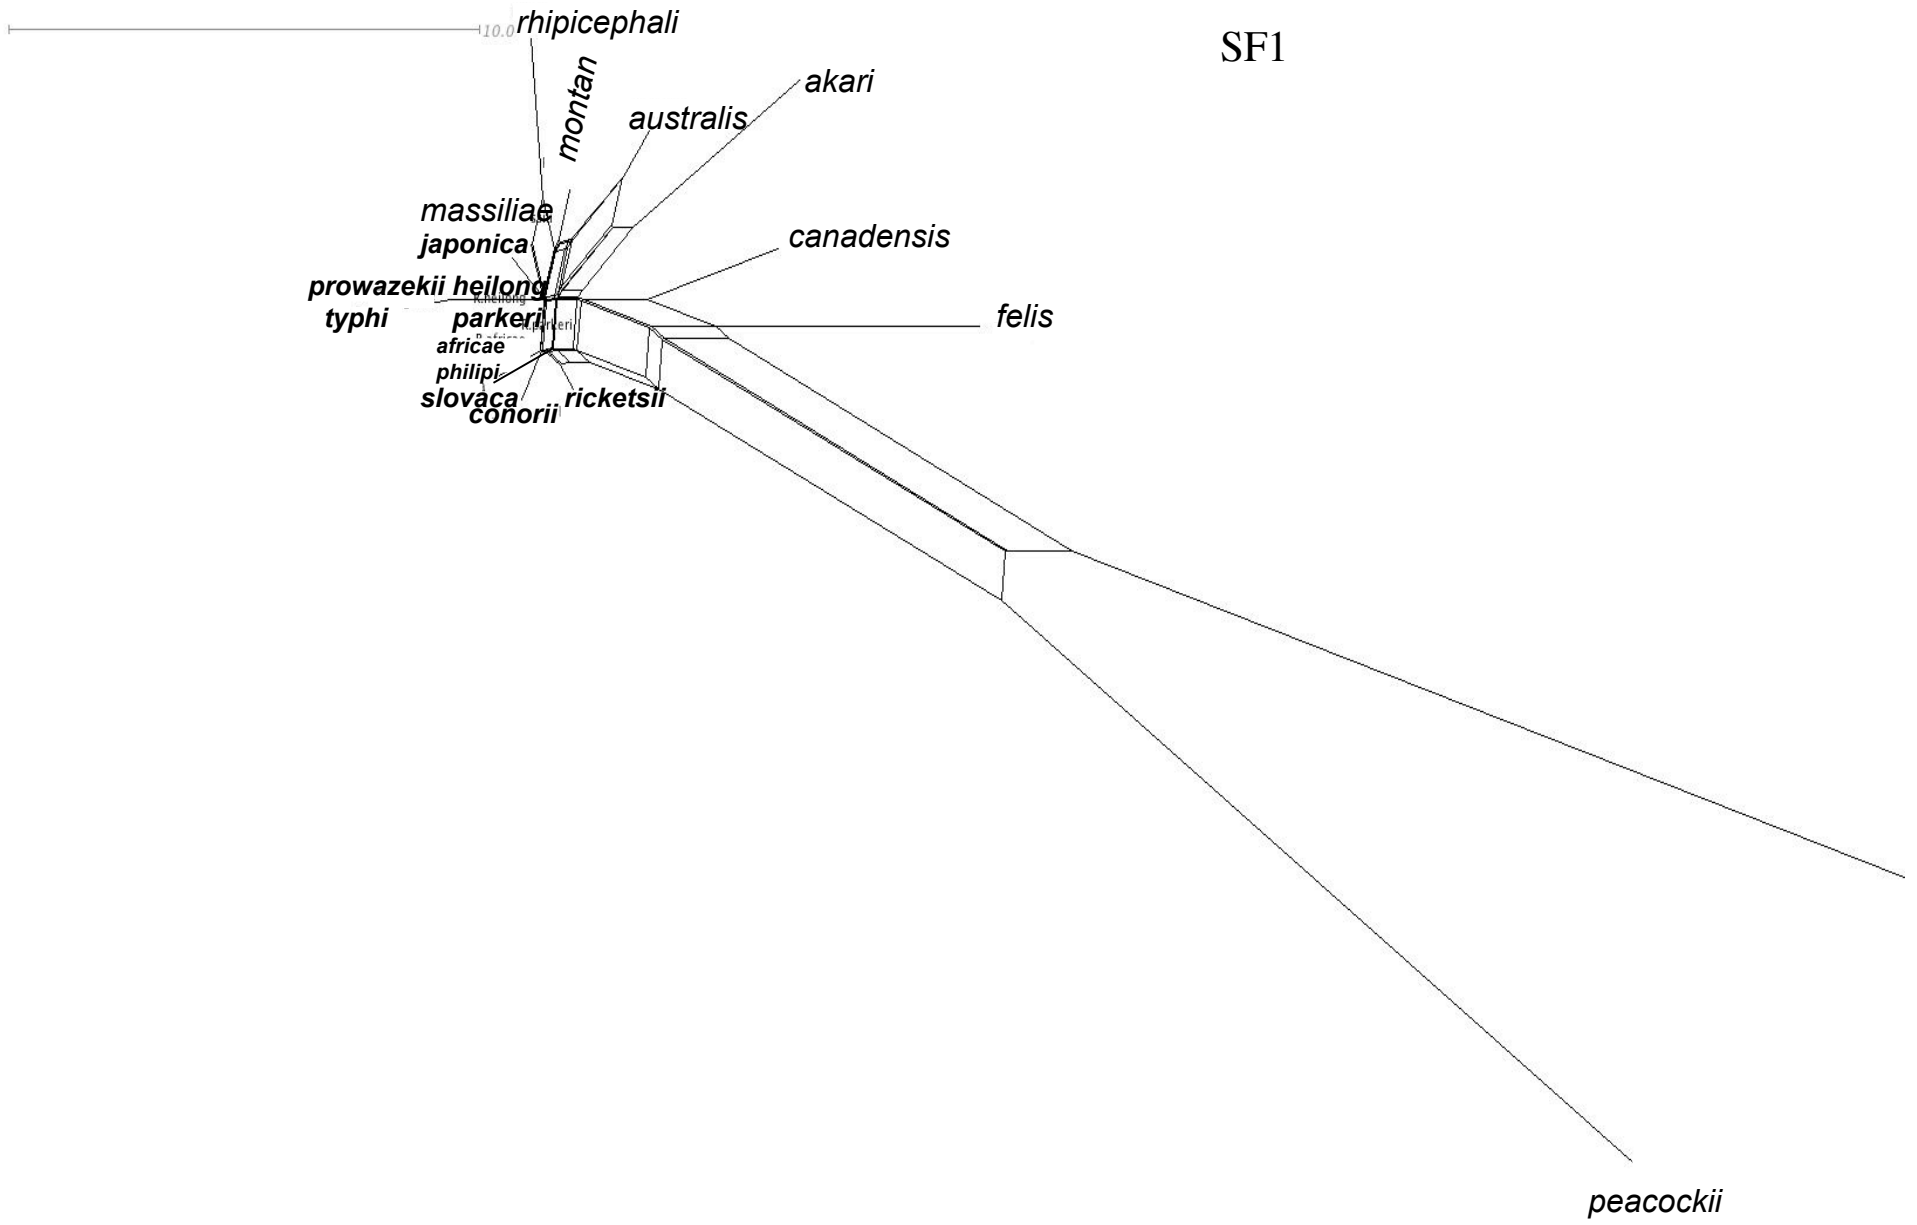

SF2

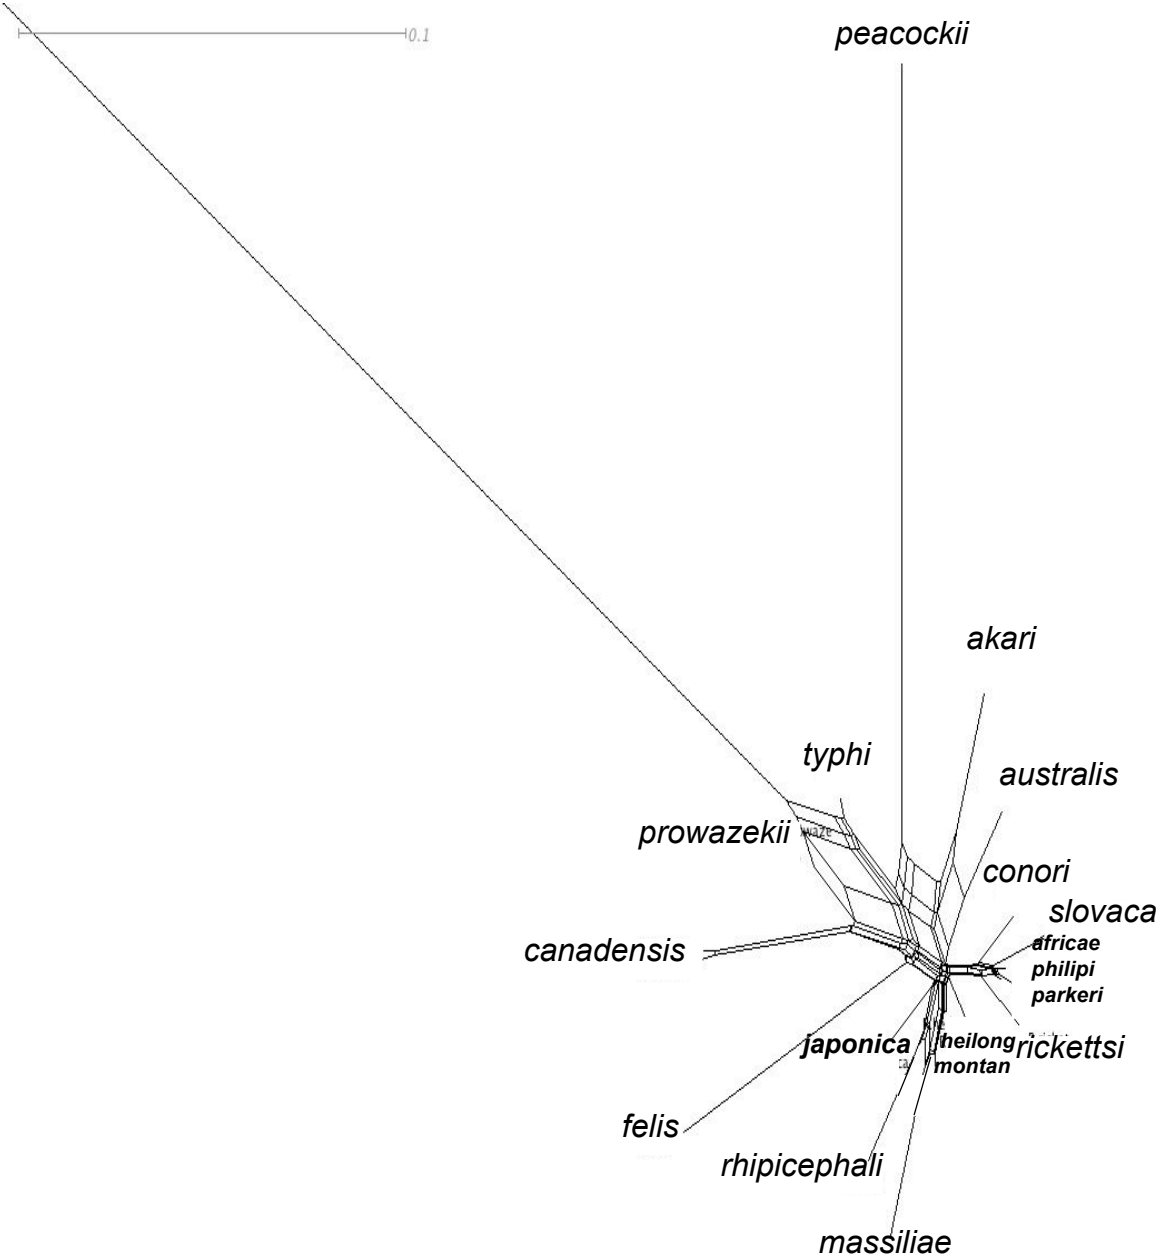

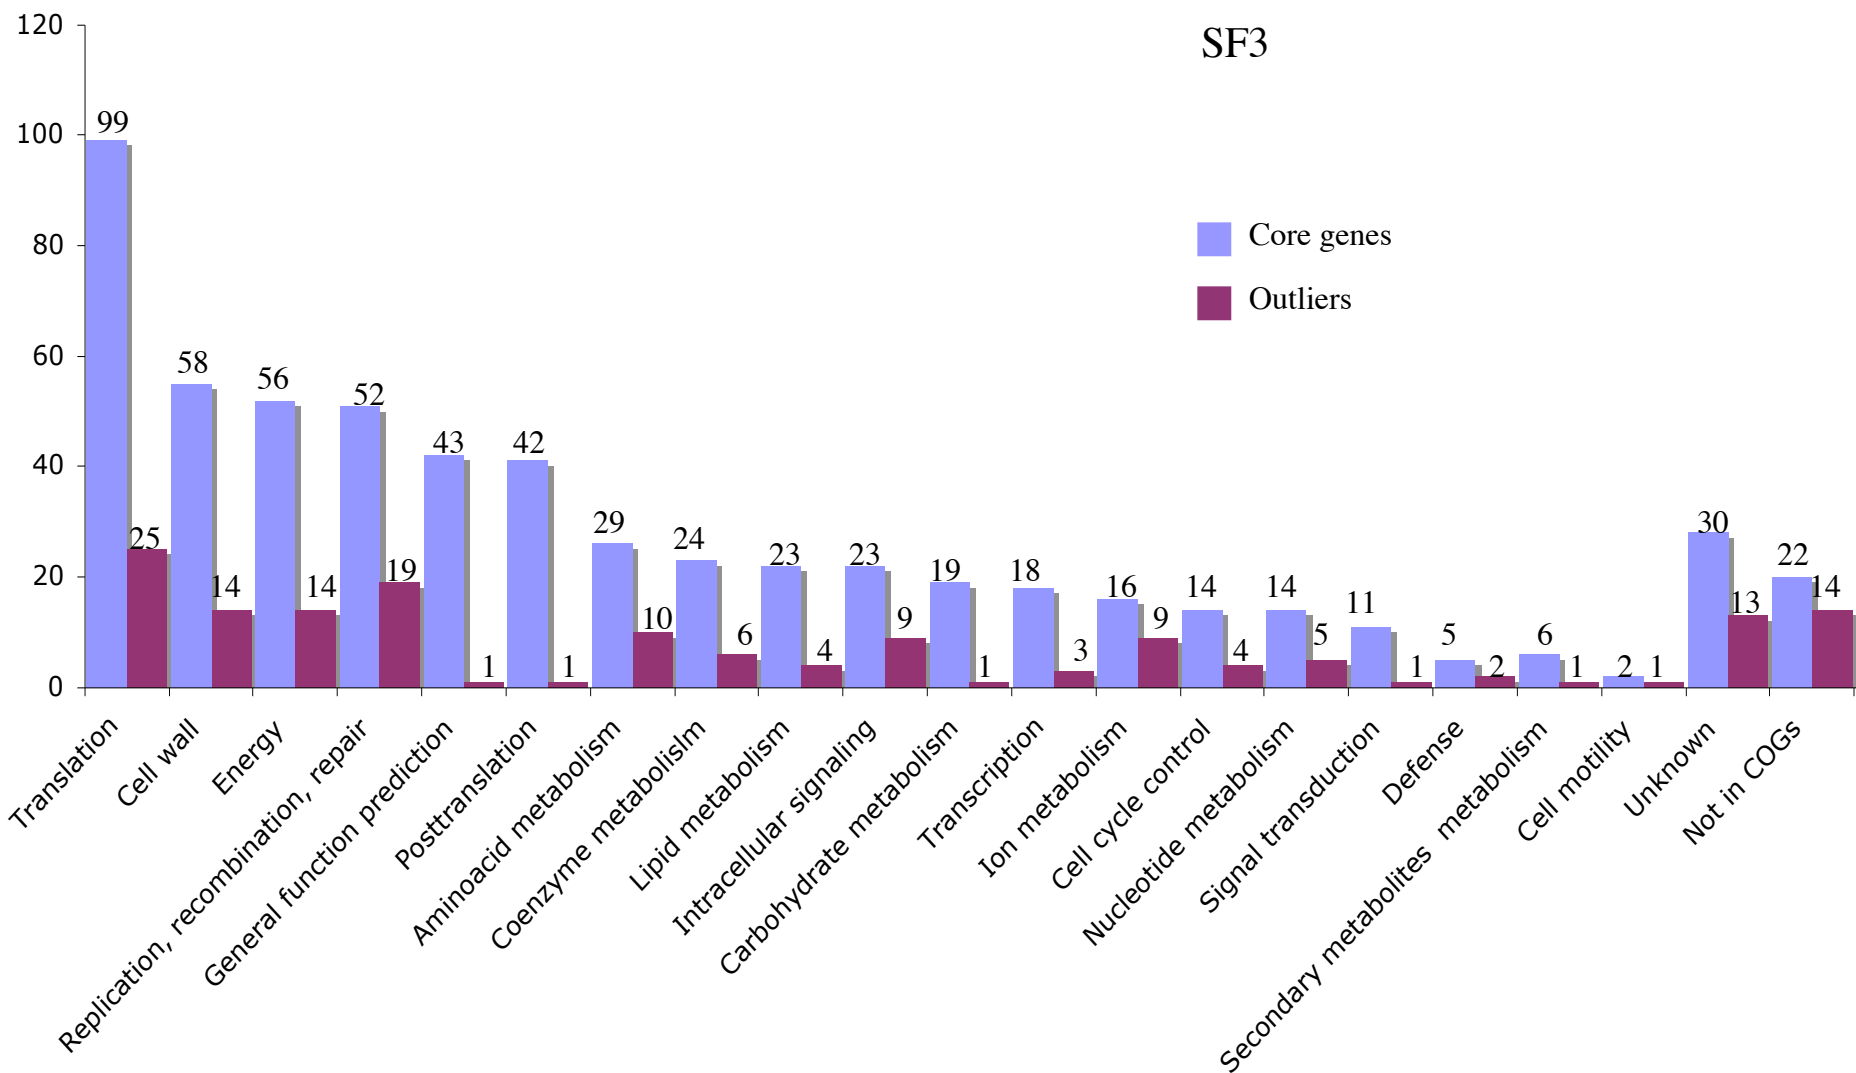

0.0010

SF4

belli 1  
belli 1

canadensis 1  
canadensis 2

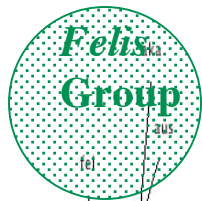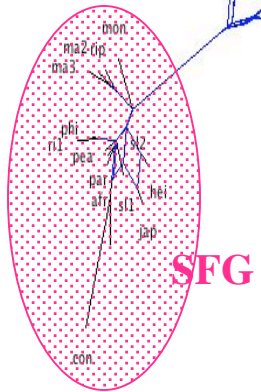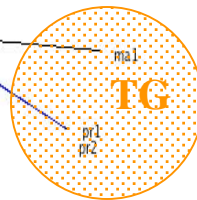

r

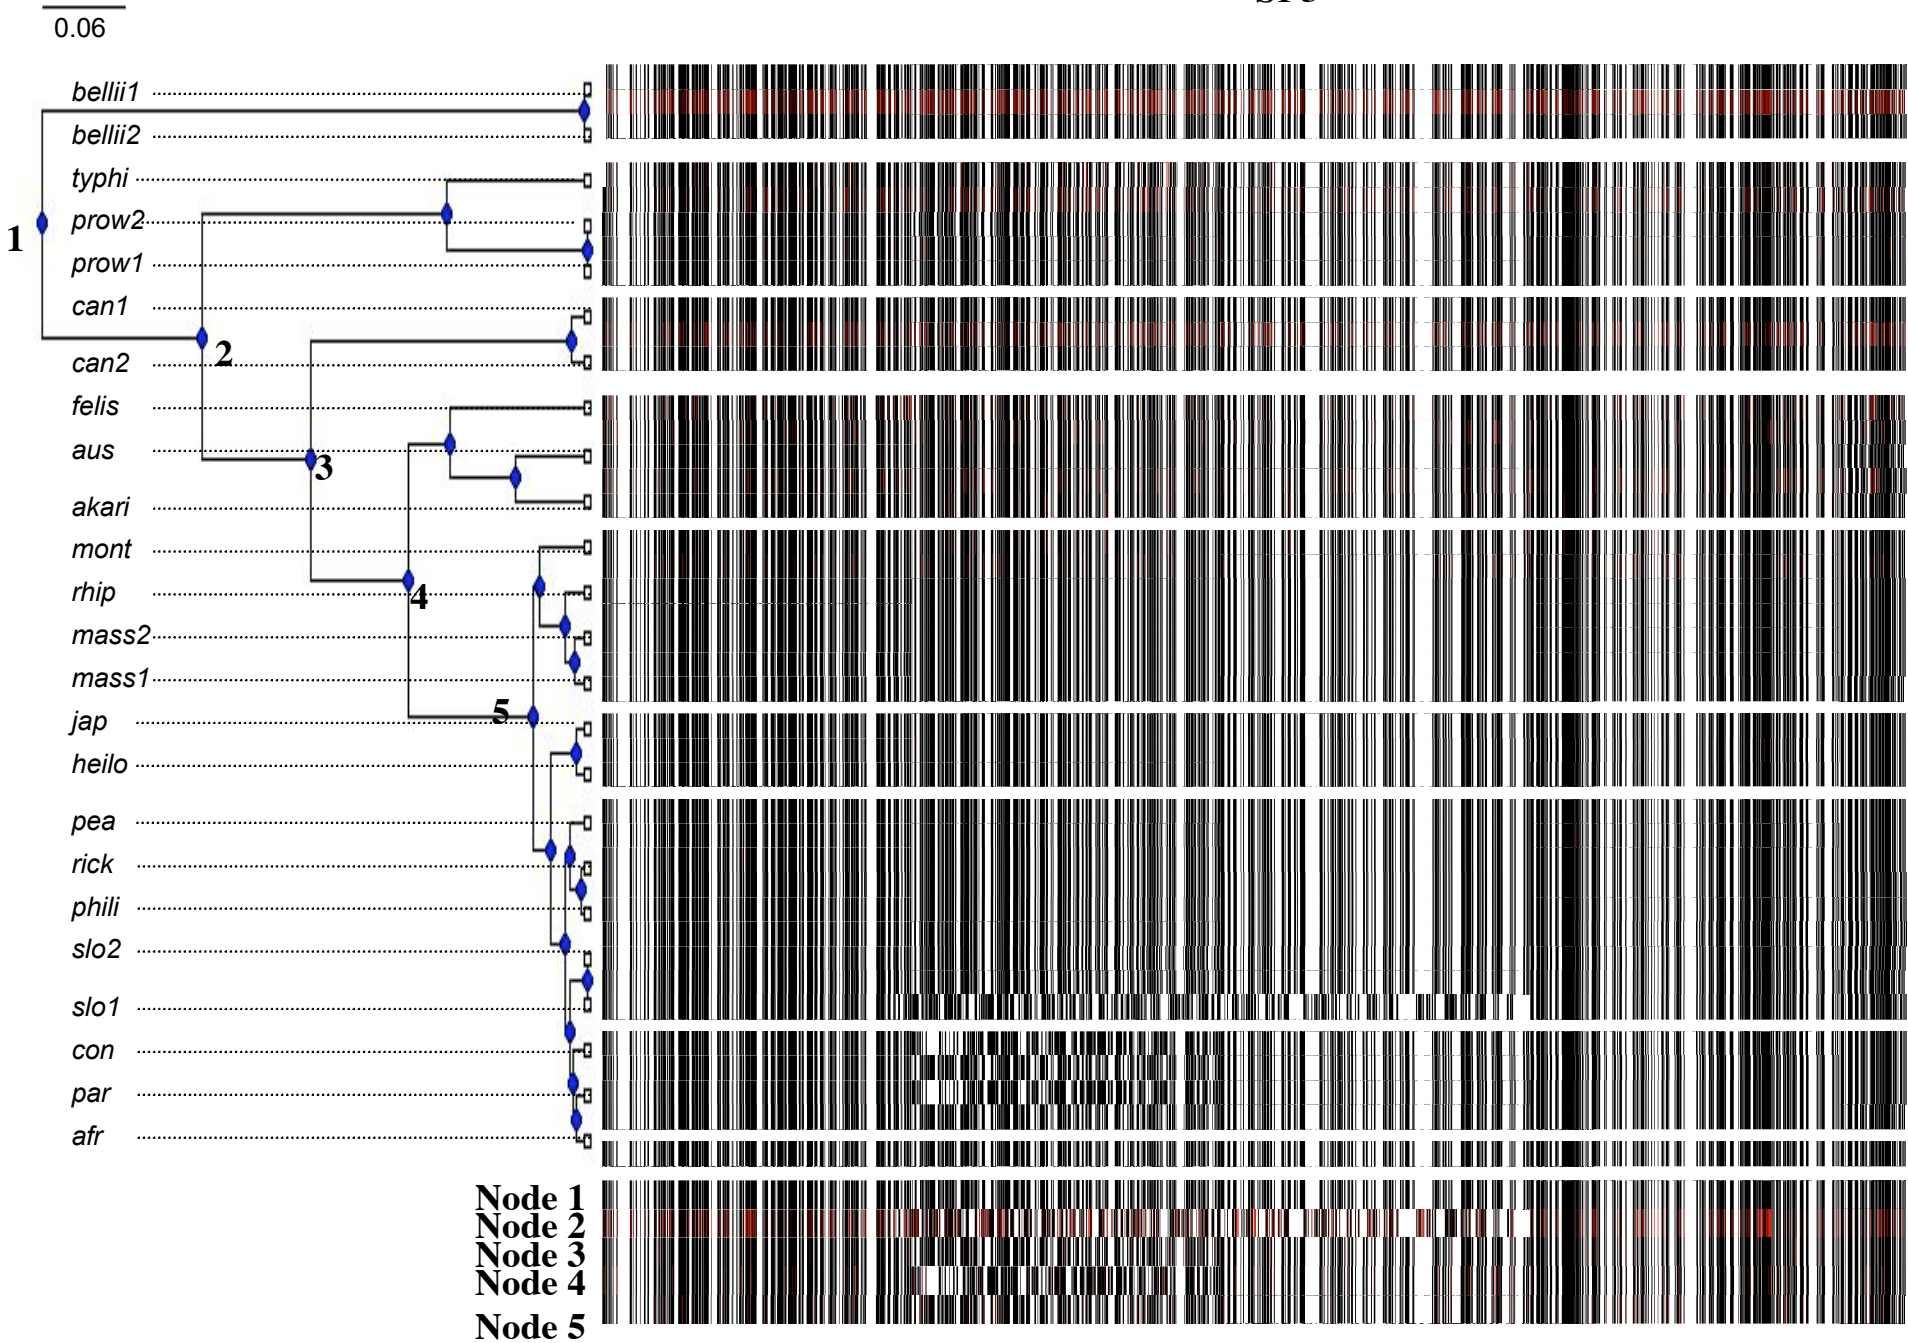

Supplement: supp_evt178_Suppl.figs.pdf [file supp_evt178_Suppl.figs.pdf]
